# Supplementary material for: Rapid Support for Older Adults during the initial stages of the COVID-19 Pandemic: Results from a Geriatric Psychiatry helpline
Source: bioRxiv or medRxiv preprint supplement (doi:10.1101/2020.10.29.20218750), 2020-10-29
Supplement: Supplementary file [file media-1.pdf]

**Rapid Support for Older Adults during the initial stages of the COVID-19  
Pandemic: Results from a Geriatric Psychiatry helpline**

Anna-Sophia Wahl, MD PhD<sup>1\*†</sup>, Gloria S. Benson, PhD<sup>1\*</sup>, Lucrezia Hausner, MD<sup>1</sup>, Sandra Schmitt, MSc<sup>1</sup>, Annika Knoll, MSc<sup>1</sup>, Adriana Feretti Bondy, MSc<sup>1</sup>, Dimitri Hefter, MD<sup>1</sup>, Lutz Frölich, MD<sup>1</sup>

**Supplementary Material**

**Supplementary Table 1.** Skewness and Kurtosis for mental health variables of depression and anxiety. SE Standard Error. Both variables were sufficiently normally distributed.

**Supplementary Table 2.** Table depicting the different features of help provided and subsequent appointments scheduled by us for psychiatric or psychotherapeutic counseling or support by our social worker. Total N represents the number of callers which participated in the survey. N represents the number of callers which affirmed the different features asked. The percentage was calculated as  $(N/\text{total } N) \times 100$ .

|            | <b>N</b> | <b>Skewness</b> |           | <b>Kurtosis</b> |           |
|------------|----------|-----------------|-----------|-----------------|-----------|
|            |          | <b>Value</b>    | <b>SE</b> | <b>Value</b>    | <b>SE</b> |
| Anxiety    | 35       | -0.058          | 0.398     | -1.271          | 0.778     |
| Depression | 44       | 0.293           | 0.357     | -0.908          | 0.702     |

**Supplementary Table 1** SD= Standard deviation. SE= Standard error

|                                             | <b>Total N</b> | <b>N or M (SD)</b> | <b>(%)</b> |
|---------------------------------------------|----------------|--------------------|------------|
| <b>Result of the hotline call</b>           |                |                    |            |
| Providing information of Covid-19           | 51             | 30                 | 58.8       |
| Practical help/information for daily living | 51             | 1                  | 1.9        |
| Providing social contacts                   | 51             | 1                  | 1.9        |
| Providing help for somatic diseases/issues  | 51             | 7                  | 13.7       |
| Recommendation for psychiatric counseling   | 51             | 15                 | 29.4       |
| Providing relieving psychological support   | 51             | 29                 | 56.9       |
| Providing contact to welfare work           | 51             | 1                  | 1.9        |
| <b>Subsequent treatments</b>                |                |                    |            |
| No subsequent treatments                    | 51             | 38                 | 74.5       |
| Subsequent treatments required              | 51             | 10                 | 19.6       |
| Subsequent psychiatric treatment provided   | 51             | 3                  | 5.9        |
| Subsequent psychotherapy provided           | 51             | 7                  | 13.7       |
| Subsequent welfare work provided            | 51             | 1                  | 1.9        |

**Supplementary Table 2**
